# Improved Placement of Multi-Mapping Small RNAs

Nathan R. Johnson<sup>\*†</sup>, Jonathan M. Yeoh<sup>‡</sup>, Ceyda Coruh<sup>\*†1</sup>, and Michael J. Axtell<sup>\*†</sup>

<sup>\*</sup> Intercollege Plant Biology Ph.D. Program, Huck Institutes of the Life Sciences, Penn State University, University Park, PA 16802 USA

<sup>†</sup> Department of Biology, Penn State University, University Park, PA 16802 USA

<sup>‡</sup> Department of Biology, Knox College, Galesburg, IL, 61401 USA

## Data in Public Repositories:

NCBI GEO: GSE76281

<sup>1</sup> Current address: Salk Institute for Biological Studies, La Jolla, CA, 92037 USA

## **Running Title:**

Improving Small RNA Placement

## **Author for Correspondence:**

Michael J. Axtell ([mja18@psu.edu](mailto:mja18@psu.edu))

Department of Biology, 208 Mueller lab, 16802, (814) 867-0421

## **Key Words:**

Alignment, Annotation, sRNA-seq, siRNA, miRNA, bioinformatics

## **Article Summary:**

High-throughput sequencing of small RNAs (sRNA-seq) is a frequently used technique in the study of small RNAs. Alignment to a reference genome is a key step in processing sRNA-seq libraries, but suffers from enormous rates of multi-mapping reads. Current methods for sRNA-seq alignment either place these reads randomly or ignore them, both of which distort downstream analyses. Here, we describe a locality-based weighting approach to make better decisions of placement of multi-mapped sRNA-seq data, and test our implementation of this method. We find that our method gives superior performance in terms of placing multi-mapped sRNA-seq data. An implementation of our method is freely available within the ShortStack small RNA analysis program. Use of this method may dramatically improve genome-wide analyses of small RNAs.

## Abstract

High-throughput sequencing of small RNAs (sRNA-seq) is a popular method used to discover and annotate microRNAs (miRNAs), endogenous short interfering RNAs (siRNAs) and Piwi-associated RNAs (piRNAs). One of the key steps in sRNA-seq data analysis is alignment to a reference genome. sRNA-seq libraries often have a high proportion of reads which align to multiple genomic locations, which makes determining their true loci of origin difficult. Commonly used sRNA-seq alignment methods result in either very low precision (choosing an alignment at random) or sensitivity (ignoring multi-mapping reads). Here, we describe and test an sRNA-seq alignment strategy that uses local genomic context to guide decisions on proper placements of multi-mapped sRNA-seq reads. Tests using simulated sRNA-seq data demonstrated that this local-weighting method outperforms other alignment strategies using three different plant genomes. Experimental analyses with real sRNA-seq data also indicate superior performance of local-weighting methods for both plant miRNAs and heterochromatic siRNAs. The local-weighting methods we have developed are implemented as part of the sRNA-seq analysis program ShortStack, which is freely available under a general public license. Improved genome alignments of sRNA-seq data should increase the quality of downstream analyses and genome annotation efforts.

## Introduction

High-throughput sampling of cDNA libraries derived from endogenous small RNAs (sRNA-seq) is a proven and widely used method. sRNA-seq allows both discovery and quantification of diverse regulatory small RNAs, which can include microRNAs (miRNAs), endogenous short interfering RNAs (siRNAs) and Piwi-associated RNAs (piRNAs), depending on the species and specimen. sRNA-seq data have played critical roles in the advancement of understanding of miRNAs, siRNAs, and piRNAs from numerous species. However, despite the large amounts of available sRNA-seq data, multiple issues remain. For example, the central miRNA database, miRBase, is thought to contain substantial numbers of incorrect annotations (Kozomara and Griffiths-Jones 2014; Taylor *et al.* 2014). Additionally, annotation of siRNA loci is much less well developed, especially in plants where siRNAs frequently represent the majority of expressed small RNAs (Coruh *et al.* 2014). Many factors contribute to annotation errors and omissions, including the use of sub-optimal methodologies for small RNA-seq alignments to reference genomes.

Alignment of small RNA-seq data to a reference genome remains a persistent, if perhaps under-recognized, problem. A major issue is the prevalence of multi-mapping (MMAP) reads in sRNA-seq data. MMAP reads occur when there are multiple best-scoring alignments to the reference genome. MMAP reads are quite rare in modern polyA<sup>+</sup> mRNA-seq data due to their longer read-lengths, and due to the fact that polyA<sup>+</sup> mRNAs generally are transcribed from single-copy sequences. In contrast, MMAP reads are much more frequent in sRNA-seq data due both to the short lengths of the reads and their tendency to originate from higher-copy number regions of the genome. Endogenous siRNAs are known to come from repetitive regions of many genomes

(Matzke and Mosher 2014), while identical miRNAs are often encoded by multiple paralogous loci (Cuperus *et al.* 2011).

MMAP sRNA-seq reads are often dealt with simplistically, either by randomly selecting one the possible alignment positions, or by ignoring them entirely. Both of these approaches have the advantage of computational speed, but both also have significant downsides: random selection results in large error rates, while ignoring MMAP reads discards large portions of sRNA-seq libraries. More sophisticated approaches for placing MMAP reads have been described for mRNA-seq data. Expression estimation using the ERANGE method, where the expression of MMAP reads is measured as a proportion of uniquely mapped reads within a particular read-cluster, was shown to improve estimates of mRNA abundance from mRNA-seq data (Mortazavi *et al.* 2008). A similar approach applied to cap analysis of gene expression (CAGE) data instead weights only by the number of different species of uniquely aligned reads, preventing highly expressed sequences from lending proportionally higher weight (Faulkner *et al.* 2008). Both of these methods improve the accuracy of mRNA quantification. The Rcount method uses similar ideas (Schmid and Grossniklaus 2015) but produces an alignment output, as opposed to solely a quantification of mRNA expression levels.

sRNA-seq and mRNA-seq data are similar in that both data types are expected to frequently result in local genomic clusters of aligned reads with distinct sequences. For mRNA-seq, clustering of alignment positions results from experimentally induced fragmentation of longer mRNAs in preparation for cDNA synthesis and sequencing. In sRNA-seq, nature performs the fragmentation through various RNA processing events acting on longer precursor RNAs. For miRNAs, the precursor stem-loop RNA often produces multiple variants of the major miRNA,

including miRNA\*'s and isomirs (Coruh *et al.* 2014). Endogenous siRNAs from both animals and plants are also often produced from longer hairpin or dsRNA precursors that spawn multiple distinct siRNAs (Allen *et al.* 2005; Okamura *et al.* 2008), or from short dsRNA precursors that are themselves spawned from co-located genomic clusters (Blevins *et al.* 2015; Zhai *et al.* 2015). Finally, piRNAs are also produced in large genomic clusters in multiple animals (Aravin *et al.* 2006; Malone *et al.* 2009). We thus reasoned that the biologically expected clustering of sRNA-seq reads at their true loci of origin would enable an ERANGE- or Rcount-like algorithm to improve placement of MMAP sRNA-seq reads. All of the previously described implementations of this general read-rescue strategy have specific features and settings particular to mRNAs and hence are not directly useful for sRNA-seq analysis. Thus, we implemented these general ideas into the alignments performed by an updated version of our previously described sRNA-seq analysis tool, ShortStack (Axtell 2013). Here, we describe the implementation and testing of sRNA-seq alignment performance using a local-weighting method to better place MMAP small RNA reads.

## Materials and Methods

### *Alignment methods*

In thinking about treatment of MMAP sRNA-seq reads, we make two assumptions. First, we assume that each read in a sRNA-seq experiment represents a single small RNA molecule, which therefore must have had a single genomic origin. Note that this assumption does not mean we assume that all reads with the same sequence necessarily have the same genomic origin. For instance, if we find 100 reads of identical sequence with a MMAP value of two (e.g., two possible alignment positions), it's certainly possible that some of those reads came from one location, and the rest from the other. In other words, we treat single reads as indivisible, but multiple reads with the same sequence can each be placed in a different location. Second, we assume that the goal of sRNA-seq alignment to the reference genome is to identify the site of transcriptional origin of the small RNAs, not to list their possible targets. miRNAs, siRNAs, and piRNAs all have a broadly similar function: guidance of repressive protein complexes to RNA targets based on complementarity between the small RNA and target. Small RNA-target complementarity is rarely perfect, and therefore target identification generally requires specialized methods optimized for the particular species and small RNA type in question.

We implemented alternative methods for handling MMAP sRNA-seq reads into version 3 of our general purpose sRNA-seq analysis software, ShortStack (Axtell 2013), which is publicly available at <https://github.com/MikeAxtell/ShortStack/releases>. ShortStack takes in raw sRNA-seq data (in fasta, fastq, or color-space formats), and a corresponding reference genome, and performs alignment, annotation, and quantification of expressed small RNAs (Figure 1). ShortStack uses bowtie (Langmead *et al.* 2009) as the underlying alignment engine to identify all

possible best-matched alignments for each read, subject to a default, user-adjustable limit of 50 alignments per read. ShortStack will then calculate a probability for each alignment according to one of three alternative methods (Figure 2). The calculated probabilities are then used to select a primary alignment for the read, and all of the other possible alignments are marked as secondary alignments. Alternatively, ShortStack can be instructed to simply ignore (N) all MMAP reads (Figure 2A), emulating the behavior of bowtie with option `-m 1` set, or that of Novoalign's default settings. ShortStack's random-weighting (R) method weights each alignment as simply  $1/n$ , where  $n$  is the number of possible alignment positions (Figure 2C). This emulates the default behavior of bowtie (Langmead *et al.* 2009) and bwa (Li and Durbin 2009). In contrast, ShortStack's unique-weighting (U) method is calculated as the number of uniquely-mapping reads mapping within the vicinity of an alignment (Figure 2D). MMAP alignment positions in the vicinity lend no weight with this method. The fractional method (F) uses all reads mapping within the vicinity of an alignment. Unique reads in the vicinity lend full weight, while MMAP reads provide weights inversely proportional to their MMAP-value (Figure 2E). The vicinities used in methods U and F are obtained by first dividing the reference genome into 50 nt bins. The bin of a given alignment is defined as the location of its left-most aligned nucleotide. The vicinity is then defined as the total number of reads in a five-bin window, with the center bin being that of the alignment in question. Thus, the vicinity is essentially a 250 nt window centered on the alignment in question. When run in modes U or F, MMAP reads for which the computed probabilities at all positions are equal remain a random guess. In those cases, such reads will be suppressed entirely (marked as unmapped) if they had more than three possible alignment positions (this threshold is user-adjustable).



It's important to note that the U and F weighting methods are not 'winner-take-all'. For instance, if the U method was used for the example in Figure 2, there would be a 12.5% probability that the less-likely position would be marked as the primary alignment. Similarly, MMAP placement decisions are made on per-read basis, not a per-sequence basis. For example, 100 MMAP sRNA-seq reads of identical sequence with two possible alignment positions of probabilities 80% and 20%, we expect approximately 80 of the reads to be placed in the first position, and approximately 20 of them to be placed in the second position.

### ***Data Sources***

sRNA-seq libraries from *Arabidopsis thaliana*, *Oryza sativa*, and *Zea mays* were obtained from the NCBI Sequence Read Archive (SRA) (Table S1). Libraries were selected that had over 5 million raw reads, were available in an unprocessed format, and were derived from an Illumina instrument. 3' adapter sequences were discovered using an in-house perl script: *find\_3p\_adapter.pl* (available at <http://sites.psu.edu/axtell/>) and removed using ShortStack's internal adapter trimming protocol. Simulated sRNA-seq libraries were produced to closely emulate real sRNA-seq data. This process was accomplished through a custom python script and wrapper: *sRNA-simulator.py* (File S1). This script uses a real sRNA-seq library as the basis for each simulated library. Real sRNA-seq libraries were aligned using bowtie (Langmead *et al.* 2009) reporting all alignments. Regions of the genome which had no alignments were removed from consideration as simulated loci, while genomic regions prone to alignments with certain length classes of sRNAs became candidate regions for simulated heterochromatic (het) siRNA (23 - 24 nt) and trans-acting siRNA (21 nt) loci. miRNA candidate regions were picked based on prior annotated loci, available through miRBase (Kozomara and Griffiths-Jones 2014). Simulated loci were chosen from these candidate regions at random. Five million reads were

then generated from these simulated loci, generating roughly 3.25M het-siRNA, 1.5M miRNA and 250k tasiRNA reads. Loci were made to approximate real loci in size and pattern: het-siRNA as primarily 24 nt RNAs from 200-1000 nt loci, from both genomic strands; miRNA as 21 nt RNAs from 125 nt loci with a miRNA and miRNA\* pattern; tasiRNA as 21 nt RNAs from 140 nt loci producing a number of phased reads, from both genomic strands. All three loci types produced a realistic distribution of differently sized or shifted reads to simulate mis-processing. Sequencing errors are simulated at a rate of one mis-sequenced base per 10,000 reads. Unlike real data, simulated reads are traceable to their locus of origin, and thus are suitable to discern correct placements from incorrect ones. polyA+ mRNA-seq data were obtained from SRA (Table S1). Reference genome versions were TAIR10 (*Arabidopsis thaliana*), IRGSP7 (*Oryza sativa*), and B73v3 (*Zea mays*).

### ***Alignments and analyses***

sRNA-seq libraries were aligned using ShortStack (Axtell 2013), bowtie (Langmead *et al.* 2009), bwa (Li and Durbin 2009) and Novoalign (Novocraft.com). Specific versions and settings are specified in Table S2. mRNA-seq libraries were aligned using tophat2 (Kim *et al.* 2013) with bowtie (Langmead *et al.* 2009) as its alignment algorithm.

### ***Analysis of Pol IV / RDR2-dependent siRNAs***

Candidate RNA polymerase IV / RDR2 (P4R2)-dependent siRNA precursors were obtained from RNA-seq data from *Arabidopsis thaliana* *dcl234* triple mutants (Li *et al.* 2015; Blevins *et al.* 2015; Zhai *et al.* 2015; Ye *et al.* 2016). Alignment was performed using bowtie, tolerating no mismatches and retaining only uniquely aligned reads between 28 and 60 nts in length. These reads were then used to computationally generate four 24 nt siRNA ‘daughters’ from each

putative precursor, corresponding to both ends of top and bottom strands of the presumed duplex. Computational daughters that were actually sequenced in the corresponding wild-type sRNA-seq libraries (Table S1) were noted. The wild-type sRNA-seq data were aligned using different alignment approaches. The precision of the tracked MMAP daughter reads was assessed using the coordinates of the corresponding uniquely aligned precursor as the known true origins.

### ***sRNA-seq***

Total RNA was isolated from wild-type Col-0 *Arabidopsis thaliana* inflorescences using Tri-Reagent per the manufacturer's instructions (ThermoFischer, 4368814). sRNA-seq libraries were constructed using the Tru-Seq sRNA kit (Illumina, RS-200-0012) per the manufacturer's instructions, and sequenced on an Illumina Hi-Seq 2500. sRNA-seq data has been deposited at NCBI GEO under accession GSE76281 (Table S1).

### ***qRT-PCR of primary miRNA transcripts***

Total RNA was isolated from wild-type Col-0 *Arabidopsis thaliana* inflorescences using Tri-Reagent per the manufacturer's instructions (Thermo Fisher, AM9738). Primers were designed using the NCBI PrimerBlast tool (Ye *et al.* 2012) and targeted the 3' region downstream of the Dicer-Like (DCL) cleavage sites. Primer sequences are given in Table S3. cDNA was synthesized by reverse transcription kit (Thermo Fisher, 4368814) and qRT-PCR experiments run on a Life Technologies StepOne Plus real-time PCR instrument using SYBR Green-based master mix (Quanta Biosciences, 95073-012) per manufacturer's instructions. Expression is calculated as the fluorescence relative to Actin (ACT2), calculated using grouped PCR efficiencies from analysis by LinRegPCR (Ramakers *et al.* 2003; Čikoš *et al.* 2007).

### ***Data availability***

Information on sequencing libraries generated in this study are available through NCBI GEO, accession number GSE76281. Information and accessions for all other libraries used are available in Table S1. The sRNA0seq simulator script is provided as File S1 and all other scripts used in analysis are available upon request. Sequences and annotation information for miRNAs were acquired through miRBase (Kozomara and Griffiths-Jones 2014).

## Results and Discussion

### *Prevalence of MMAP reads in sRNA-seq data*

In a survey of polyA+ mRNA-seq data from three plant species, MMAP percentages above 10% are rare (Figure 3A). In contrast, sRNA-seq datasets from the same three species frequently have over 50% MMAP reads (Figure 3A). This illustrates the extent of the MMAP problem specifically in sRNA-seq data. We examined a collection of studies ( $n = 20$ ) where plant sRNA-seq data were aligned to a reference genome (Figure 3B, Table S4). In 80% of the cases, MMAP reads were handled by random selection, where a single possible alignment is randomly selected for each MMAP read. Although computationally easy, random selection is highly imprecise, as most random choices will be wrong. Another 10% of the studies examined simply ignored MMAP reads. This method has the clear disadvantage of discarding huge amounts of data, often over 50% (Figure 3A). This survey of data and published studies clearly indicates that MMAP reads are a large issue in sRNA-seq data analysis that are often dealt with ineffectively.

### *High-precision alignments of MMAP sRNA-seq reads*

We designed two alternative modes of proximity-based weighting systems (U and F) to place MMAP reads, and implemented them into the sRNA-seq analysis software ShortStack (Figure 2) (Axtell 2013). We then conducted a performance analysis comparing these methods to several other aligners with various settings. The alignment methods can be classified into three groups based on their treatment of MMAP reads (Figure 2A): ShortStack-U and -F both use a proximity-weighted scheme to influence placement of MMAP reads. In contrast, under their default settings bowtie (Langmead *et al.* 2009) and bwa (Li and Durbin 2009) randomly place MMAP reads, as will ShortStack when run in the R mode. Finally, Novoalign, bowtie with

setting -m 1, and ShortStack in mode N all will simply ignore MMAP reads. We simulated sRNA-seq data based on the properties of real datasets from *Arabidopsis thaliana*, *Oryza sativa*, and *Zea mays*. Unlike real data, the ‘correct’ alignment location for each MMAP is known for simulated data. This allows direct comparison of aligner performance. Specifically, we can count true positives (aligned reads that are put in the correct position; TP), false positives (aligned reads that are put in the incorrect position; FP), true negatives (unaligned reads that have no possible alignment position; TN), and false negatives (unaligned reads where there is at least one valid alignment position; FN). Precision ( $TP/(TP + FP)$ ) and sensitivity ( $TP/(TP + FN)$ ) can then be calculated in the standard manner.

In nearly all cases, the highest precisions were obtained with ShortStack’s U method (Figure 4A). ShortStack-U had significantly (Kruskal–Wallis ANOVA with Dunn multiple comparison test,  $\alpha = 0.05$ ) higher precisions than any non-ShortStack method. The results were especially striking when examining the precision specifically for MMAP reads. ShortStack’s U method routinely achieved precision values of 75% or higher (Figure 4A). In contrast, none of the random-placement or ignore MMAP methods ever had MMAP precision values over 50%. The high precision does come at the cost of sensitivity: As described in the methods, ShortStack-U and -F will not place all MMAP reads. Instead, if a read has too many possible positions (default is  $> 50$ ) or if the weighted probabilities are equal, MMAP reads are suppressed. Depressed sensitivities are more apparent in the more repetitive genome of *Zea mays* as compared to *Arabidopsis thaliana* (Figure 4A). We computed F1 scores (harmonic means of precision and sensitivity) to assess the balance between precision and sensitivity. By this metric, ShortStack-U and -F both performed significantly (Kruskal–Wallis ANOVA with Dunn multiple comparison test,  $\alpha = 0.05$ ) better than any other method in all three species (Figure 4A).

Analysis of real libraries is limited to examination of false negative rates ( $FNR = FN / (FN + TP)$ ), as TP and FP cannot be distinguished. As expected, FNRs are higher in *Zea mays* and *Oryza sativa* relative to *Arabidopsis thaliana*, reflecting the higher proportions of reads with high MMAP-values from the more repetitive genomes (Figures 4C). Under default settings, ShortStack's U and F methods discard ~30-50% of the MMAP reads from rice and maize, but are likely placing the remainder with very high confidence.

### ***Precision is a function of MMAP-value***

As discussed above, our methods by default will not attempt weighting or placement of MMAP reads with more than 50 possible alignment positions. This is based on the prediction that for reads with very high MMAP-values, we will have an unacceptably high error rate. We tested this prediction by examining the precision values in our simulated datasets as a function of MMAP value (Figures 5A-B). As expected, precision declines as a function of higher MMAP values in all cases (Figure 5A), with random having the most severe drop-off. Notably, the U method consistently gives the highest precisions at a given MMAP value. Analysis of cumulative precisions showed that plateaus of precision generally became apparent at MMAP-values ~ 50 (Figure 5B), justifying our default settings to ignore reads with more than 50 possible alignment positions. Our simulated data had more high MMAP reads than real data (Figure 5C), indicating that aligner performance with real data is likely to be superior to that of estimated using simulated reads.

### ***Experimental testing of alignment methods***

Mature miRNAs are frequently encoded by multiple paralogous loci, which causes sRNA-seq reads corresponding to the mature miRNA to be MMAPed. However, the primary transcripts derived from each of the paralogs typically are much longer and have distinct sequences, such that qRT-PCR approaches can distinguish them. We used accumulation levels of primary transcripts as proxies for the true expression levels of various *Arabidopsis thaliana* MIRNA loci that encode identical mature miRNAs, and compared those data to estimates derived from small RNA-seq alignments (Figure 6). qRT-PCR indicated sharp differences in primary transcript accumulation for each of the three miRNA families we studied (Figure 6A). ShortStack's U method produced mature miRNA alignments that were mostly similar to the results from qRT-PCR of the primary transcripts (Figure 6B). In contrast, the other alignment methods suggested nearly equal accumulation of mature miRNAs from each of the paralogs. We quantified the fit between the qRT-PCR data and the sRNA-seq alignment data by analyzing the squared residual errors between the scaled expression levels (Figure 6C). By this metric, ShortStack-U predicts the specific contributions of miRNA paralogs significantly (Kruskal–Wallis ANOVA with Dunn multiple comparison test,  $\alpha = 0.05$ ) better than all other tested methods.

When DCL enzymes are absent from *Arabidopsis thaliana*, longer double-stranded RNAs accumulate that are dependent on RNA polymerase IV (Pol IV) and RNA-dependent RNA polymerase 2 (RDR2) (Li *et al.* 2015; Blevins *et al.* 2015; Zhai *et al.* 2015; Yang *et al.* 2016; Ye *et al.* 2016). These are likely to be the direct substrates for the DCL3-mediated production of 24 nt siRNAs by excision from the ends of precursors. We identified a set of longer precursors from *dcl2/dcl3/dcl4* triple mutant plants that could be uniquely mapped to the reference genome. We then computationally diced this set of precursors to create predicted mature 24 nt siRNAs, and examined the corresponding wild-type sRNA-seq libraries to find cases where the putative



mature siRNAs actually were sequenced. The wild-type sRNA-seq libraries were aligned with various methods. Cases where the mature siRNAs of interest were MMAP allowed assessment of alignment precision, as we presume their uniquely aligned precursors represent the correct alignment positions. ShortStack-U significantly (Kruskal–Wallis ANOVA with Dunn multiple comparison test,  $\alpha = 0.05$ ) outperformed other alignment methods (Figure 7) in this analysis, as measured by precision. Thus, experimental data from both miRNAs and endogenous siRNAs supports the hypothesis that ShortStack’s U alignment method is superior.

### ***Bowtie shows bias in random read placement***

When run under default settings, bowtie (Langmead *et al.* 2009) randomly selects one possible alignment position for MMAP reads. However, the software documentation warns that biased strand selection, where alignment positions from one strand are favored, can occur (Langmead *et al.* 2009). For sRNA-seq data, we have observed that this strand bias is quite strong. We observe a strong top strand bias when bowtie is run under default settings to align sRNA-seq data (Figure 8). Indeed, this can affect estimation of miRNA accumulation from paralogs (Figure 6B, miR166e). This bias is not apparent when other methods are used (Figure 8). Small RNA polarity is an important feature used for annotations, so it is conceivable that this strand bias could distort results.

### ***Speed testing***

We compared the alignment speed of our methods with those of other aligners. To account for differences caused by different genome sizes and/or sRNA-seq libraries, we measured speed in normalized units. Because bowtie under default settings was always the fastest method, we normalized each run to a multiple of the bowtie-default completion speed. The time spent on

genome-indexing was not part of this assessment. In general, our favored method, ShortStack-U, was five to ten times slower than bowtie-default, but comparable to bwa (Figure 9). Given that the results of ShortStack-U are superior to the other methods, we feel that the extra time is an acceptable trade-off. In absolute terms, the wall-time for our ShortStack-U runs on these data ranged from 6 minutes to 2.5 hours, compared with bowtie-default which ranged from 1 to 32 minutes.

## ***Conclusions***

A particularly important goal of ours is to reduce the likelihood of false discoveries in small RNA gene annotation. Reducing the number of incorrect alignments is likely to reduce spurious annotations. ShortStack-U gives fewer false positives for MMAP reads than all other methods for sRNA-seq alignment (Figure 4, 5, 7). The experimental evidence identifying miRNA alignment is striking, as mature miRNA are remarkably poorly placed through standard approaches (Figure 6). It is likely that misalignment of this nature is significantly misrepresenting the abundance of many loci, conceivably resulting in mis-annotations. ShortStack-U's alignment method reduces these risks, striking a balance between precision and sensitivity.

A method which is capable of identifying the true site of origin for all MMAP sRNA-seq reads is elusive. To achieve reasonable precision, our methods sacrifice some sensitivity by ignoring highly MMAP reads. However, it should be kept in mind that these reads are part of the small RNA profile too and should not be completely ignored. Future development of sRNA-seq alignment methods should focus on increasing precisions to allow confident placement of even

the most repetitive reads. Until then, these most highly-repetitive reads can be analyzed using methods independent of alignment to the reference genome.

Overall, our work demonstrates that sRNA-seq alignments can be significantly improved by using local weighting to guide placement of multi-mapped reads, and that biases in placement of multi-mapped reads can influence downstream analyses.

## Author Contributions

MJA developed ShortStack code. NRJ and MJA developed alignment algorithm ideas and ideas for performance testing. NRJ conducted performance analyses and generated all figures. NRJ and JY conducted qRT-PCR experiments. CC constructed sRNA-seq libraries. MJA and NRJ wrote the manuscript with comments from JY and CC.

## Acknowledgements

This work was supported by an award from the US NSF to MJA (award # 1339207). sRNA-seq was conducted on an Illumina HiSeq2500 purchased with funds from a US NSF award to MJA (award #1229046)

## Figure Legends

**Figure 1.** Overview of ShortStack methodology.

**Figure 2.** Weighting methods for placement of MMAP reads.

- A) Alignment tools grouped by MMAP methods.
- B) Example of local alignments for a read (green) with an MMAP-value of two. Numbers adjacent to reads indicate their MMAP-value
- C) Weighting scheme for random placement of MMAP reads.
- D) Weighting scheme for ShortStack's Unique method.
- E) Weighting scheme for ShortStack's Fractional method.

**Figure 3.** Prevalence of MMAP reads and methods

A) MMAP rates for reads from mRNA-seq and sRNA-seq data from *Arabidopsis thaliana* (At), *Oryza sativa* (Os), and *Zea mays* (Zm). Horizontal bars mark median values, circles mark values for individual libraries.

B) Proportion of MMAP-selection methods for sRNA alignment in recent literature (n = 20; Table S4).

**Figure 4.** Performance analysis of sRNA-seq alignment methods.

A) Precisions, sensitivities, and F1 scores for alignments of simulated sRNA-seq data with the indicated methods for entire datasets. Boxplots show medians (central bars), the 1st to 3rd quartile range (boxes), other data out to 1.5 the interquartile range (whiskers), and outliers (dots). n=15, 12, and 21 for the At, Os, and Zm data, respectively. Treatments sharing a common letter indicate groups that are not significantly different by non-parametric analysis (Kruskal–Wallis ANOVA with Dunn multiple comparison test,  $\alpha = 0.05$ ). At: *Arabidopsis thaliana*, Os: *Oryza sativa*, Zm: *Zea mays*.

B) MMAP reads only. Same analysis and conventions as in panel A.

C) False negative rates for alignments of real sRNA-seq data with the indicated methods for MMAP reads. Plotting conventions as in panel A.

**Figure 5.** Influence of MMAP-value on performance

A) Precision as a function of MMAP-value for simulated sRNA-seq data from the indicated species and alignment method. MMAP-value is the number of possible alignment positions for a read. Colored lines are standard deviations, black dots are mean values. Heavy dashed line at

MMAP=50 indicates the default cutoff value for ShortStack, above which placement of MMAP reads is not attempted. At: *Arabidopsis thaliana*, Os: *Oryza sativa*, Zm: *Zea mays*.

B) Cumulative precision as a function of MMAP-value for simulated sRNA-seq data from the indicated species and alignment method. Plotting conventions as in panel A.

C) Cumulative proportion of real and simulated sRNA-seq data retained by ShortStack alignments under differing MMAP-value cutoffs. Note that simulated libraries have higher proportions of reads with high MMAP values. Plotting conventions as in panel A.

**Figure 6.** Experimental assessment of sRNA-seq alignment methods using miRNA paralogs

A) Relative expression of the indicated primary *MIRNA* transcripts in *Arabidopsis thaliana* Col-0 inflorescences assessed via qRT-PCR. Values are normalized to 1/1000 those of *ACTIN2*. Dots show values from biological replicates (n=3).

B) Accumulation of the indicated mature miRNAs from each of their possible paralogs as determined by different sRNA-seq alignment methods. Values are from three biological replicate sRNA-seq libraries from *Arabidopsis thaliana* Col-0 inflorescences.

C) Squared residual errors from comparisons of scaled qRT-PCR data to scaled sRNA-seq alignment results. Boxplots show medians (horizontal bars), the 1st to 3rd quartile range (boxes), data out to 1.5 times the inter-quartile range (whiskers), and outliers (dots). Treatments sharing a common letter indicate groups that are not significantly different by non-parametric analysis (Kruskal–Wallis ANOVA with Dunn multiple comparison test,  $\alpha = 0.05$ ).

**Figure 7.** Precisions from alignments of *Arabidopsis thaliana* MMAP 24 nt siRNAs whose true origins are known based on a unique precursor alignment. Dots: data from individual libraries; horizontal bars: medians. Treatments sharing a common letter indicate groups that are not

significantly different by non-parametric analysis (Kruskal–Wallis ANOVA with Dunn multiple comparison test,  $\alpha = 0.05$ ).

**Figure 8.** Strand-biased selection of MMAP alignment positions by bowtie. Bias is shown as the overall ratio of top-strand aligned reads to bottom, based on simulated libraries from *Arabidopsis thaliana* (n=15). Boxplots show medians (horizontal bars), the 1st to 3rd quartile range (boxes), data out to 1.5 times the inter-quartile range (whiskers), and outliers (dots). Treatments sharing a common letter indicate groups that are not significantly different by non-parametric analysis (Kruskal–Wallis ANOVA with Dunn multiple comparison test,  $\alpha = 0.05$ ).

**Figure 9.** Comparison of alignment times for real sRNA-seq libraries with the indicated methods. Boxplots show medians (central bars), the 1st to 3rd quartile range (boxes), other data out to 1.5 the interquartile range (whiskers), and outliers (dots). n=15, 12, and 21 for the At, Os, and Zm data, respectively. At: *Arabidopsis thaliana*, Os: *Oryza sativa*, Zm: *Zea mays*.

## Supplemental Data

Supplemental Table 1: Dataset accession numbers and descriptions

Supplemental Table 2: Versions and settings

Supplemental Table 3: Oligo sequences

Supplemental Table 4: Methods used for placement of MMAP sRNA-seq reads in 20 previous studies.

Supplemental File 1: *sRNA-simulator.py* : Python script used to create simulated sRNA-seq datasets.





## References Cited

- Allen, E., Z. Xie, A. M. Gustafson, and J. C. Carrington, 2005 microRNA-directed phasing during trans-acting siRNA biogenesis in plants. *Cell* 121: 207–221.
- Aravin, A., D. Gaidatzis, S. Pfeffer, M. Lagos-Quintana, P. Landgraf *et al.*, 2006 A novel class of small RNAs bind to MILI protein in mouse testes. *Nature* 442: 203–207.
- Axtell, M. J., 2013 ShortStack: comprehensive annotation and quantification of small RNA genes. *RNA* 19: 740–751.
- Blevins, T., R. Podicheti, V. Mishra, M. Marasco, H. Tang *et al.*, 2015 Identification of Pol IV and RDR2-dependent precursors of 24 nt siRNAs guiding de novo DNA methylation in Arabidopsis. *Elife* 4: e09591.
- Čikoš, Š., A. Bukovská, and J. Koppel, 2007 Relative quantification of mRNA: comparison of methods currently used for real-time PCR data analysis. *BMC Mol. Biol.* 8: 1–14.
- Coruh, C., S. Shahid, and M. J. Axtell, 2014 Seeing the forest for the trees: annotating small RNA producing genes in plants. *Curr. Opin. Plant Biol.* 18: 87–95.
- Cuperus, J. T., N. Fahlgren, and J. C. Carrington, 2011 Evolution and functional diversification of MIRNA genes. *Plant Cell* 23: 431–442.
- Faulkner, G. J., A. R. R. Forrest, A. M. Chalk, K. Schroder, Y. Hayashizaki *et al.*, 2008 A rescue strategy for multimapping short sequence tags refines surveys of transcriptional activity by CAGE. *Genomics* 91: 281–288.
- Kim, D., G. Pertea, C. Trapnell, H. Pimentel, R. Kelley *et al.*, 2013 TopHat2: accurate alignment of transcriptomes in the presence of insertions, deletions and gene fusions. *Genome Biol.* 14: R36.
- Kozomara, A., and S. Griffiths-Jones, 2014 miRBase: annotating high confidence microRNAs using deep sequencing data. *Nucleic Acids Res.* 42: D68–73.
- Langmead, B., C. Trapnell, M. Pop, and S. L. Salzberg, 2009 Ultrafast and memory-efficient alignment of short DNA sequences to the human genome. *Genome Biol.* 10: R25.
- Li, H., and R. Durbin, 2009 Fast and accurate short read alignment with Burrows-Wheeler transform. *Bioinformatics* 25: 1754–1760.
- Li, S., L. E. Vandivier, B. Tu, L. Gao, S. Y. Won *et al.*, 2015 Detection of Pol IV/RDR2-dependent transcripts at the genomic scale in Arabidopsis reveals features and regulation of siRNA biogenesis. *Genome Res.* 25: 235–245.

- Malone, C. D., J. Brennecke, M. Dus, A. Stark, W. R. McCombie *et al.*, 2009 Specialized piRNA pathways act in germline and somatic tissues of the *Drosophila* ovary. *Cell* 137: 522–535.
- Matzke, M. A., and R. A. Moshier, 2014 RNA-directed DNA methylation: an epigenetic pathway of increasing complexity. *Nat. Rev. Genet.* 15: 394–408.
- Mortazavi, A., B. A. Williams, K. McCue, L. Schaeffer, and B. Wold, 2008 Mapping and quantifying mammalian transcriptomes by RNA-Seq. *Nat. Methods* 5: 621–628.
- Okamura, K., W.-J. Chung, J. G. Ruby, H. Guo, D. P. Bartel *et al.*, 2008 The *Drosophila* hairpin RNA pathway generates endogenous short interfering RNAs. *Nature* 453: 803–806.
- Ramakers, C., J. M. Ruijter, R. H. L. Deprez, and A. F. M. Moorman, 2003 Assumption-free analysis of quantitative real-time polymerase chain reaction (PCR) data. *Neurosci. Lett.* 339: 62–66.
- Schmid, M. W., and U. Grossniklaus, 2015 Rcount: simple and flexible RNA-Seq read counting. *Bioinformatics* 31: 436–437.
- Taylor, R. S., J. E. Tarver, S. J. Hiscock, and P. C. J. Donoghue, 2014 Evolutionary history of plant microRNAs. *Trends Plant Sci.* 19: 175–182.
- Yang, D.-L., G. Zhang, K. Tang, J. Li, L. Yang *et al.*, 2016 Dicer-independent RNA-directed DNA methylation in *Arabidopsis*. *Cell Res.* 26: 66–82.
- Ye, R., Z. Chen, B. Lian, M. J. Rowley, N. Xia *et al.*, 2016 A Dicer-Independent Route for Biogenesis of siRNAs that Direct DNA Methylation in *Arabidopsis*. *Mol. Cell* 61: 222–235.
- Ye, J., G. Coulouris, I. Zaretskaya, I. Cutcutache, S. Rozen *et al.*, 2012 Primer-BLAST: a tool to design target-specific primers for polymerase chain reaction. *BMC Bioinformatics* 13: 134.
- Zhai, J., S. Bischof, H. Wang, S. Feng, T.-F. Lee *et al.*, 2015 A One Precursor One siRNA Model for Pol IV-Dependent siRNA Biogenesis. *Cell* 163: 445–455.

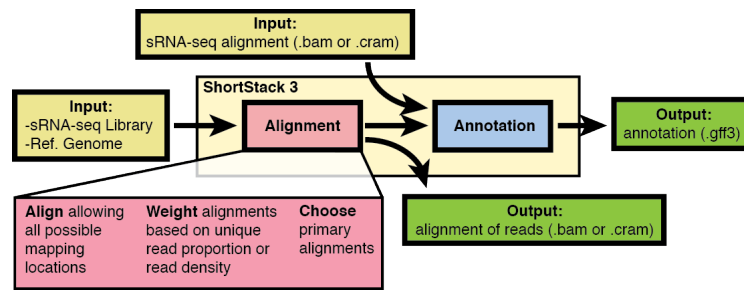

**Figure 1.** Overview of ShortStack methodology.

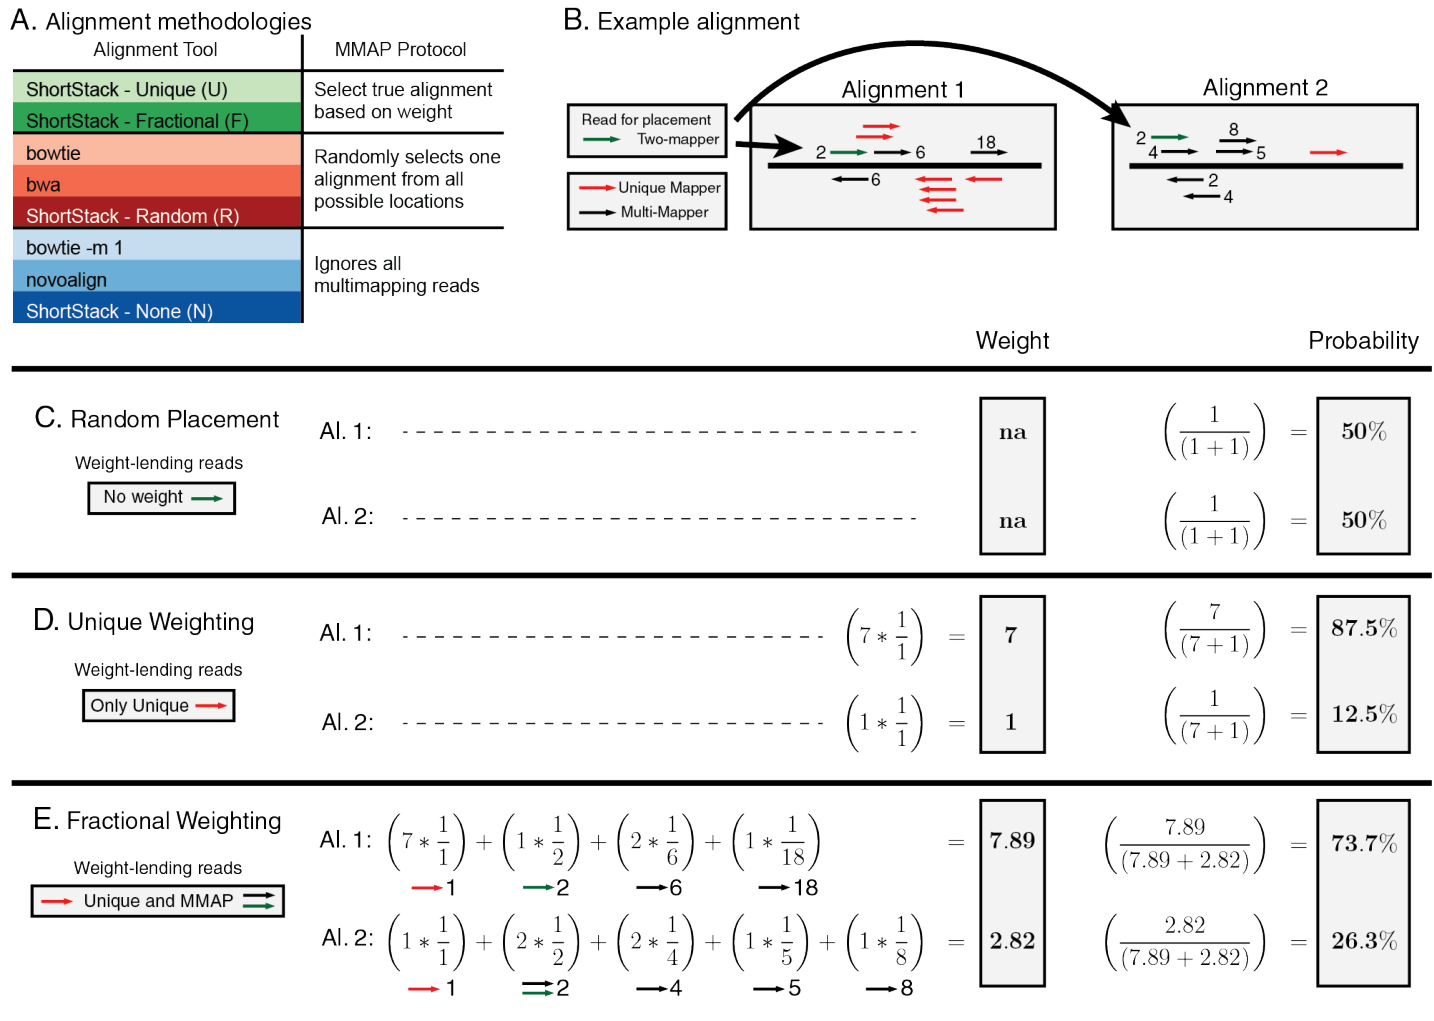

**Figure 2.** Weighting methods for placement of MMAP reads.

A) Alignment tools grouped by MMAP methods.

B) Example of local alignments for a read (green) with an MMAP-value of two. Numbers adjacent to reads indicate their MMAP-value

C) Weighting scheme for random placement of MMAP reads.

D) Weighting scheme for ShortStack's Unique method.

E) Weighting scheme for ShortStack's Fractional method.

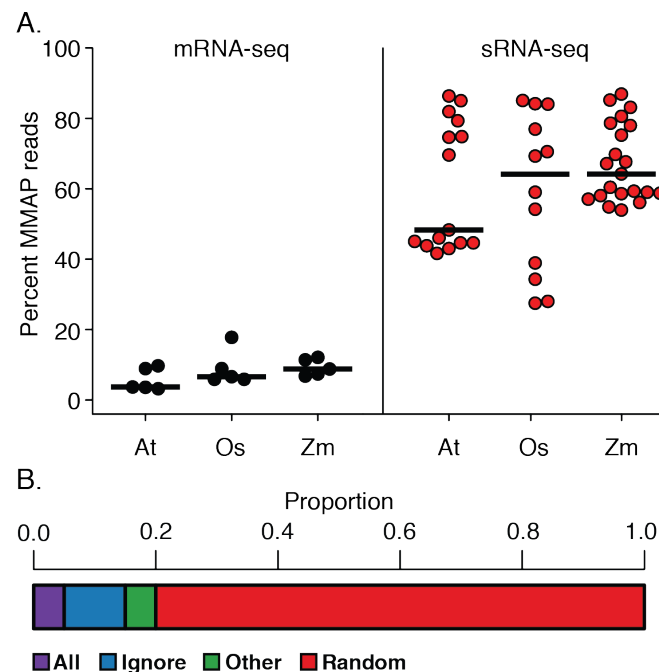

**Figure 3.** Prevalence of MMAP reads and methods

A) MMAP rates for reads from mRNA-seq and sRNA-seq data from *Arabidopsis thaliana* (At), *Oryza sativa* (Os), and *Zea mays* (Zm). Horizontal bars mark median values, circles mark values for individual libraries.

B) Proportion of MMAP-selection methods for sRNA alignment in recent literature (n = 20; Table S4).

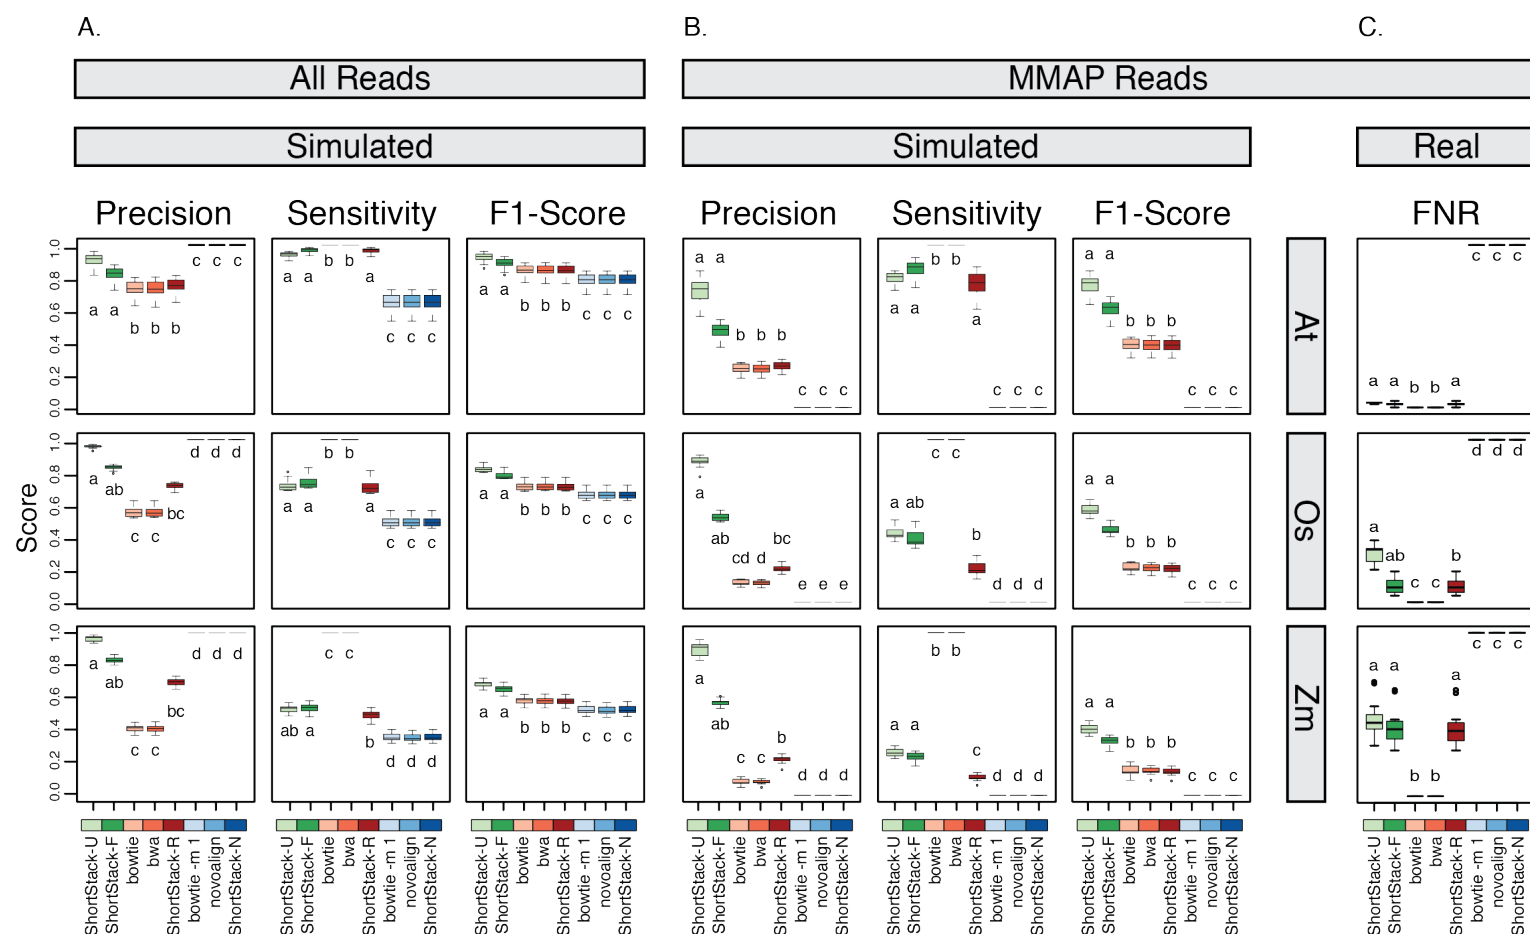

**Figure 4.** Performance analysis of sRNA-seq alignment methods.

A) Precisions, sensitivities, and F1 scores for alignments of simulated sRNA-seq data with the indicated methods for entire datasets. Boxplots show medians (central bars), the 1st to 3rd quartile range (boxes), other data out to 1.5 the interquartile range (whiskers), and outliers (dots).  $n=15$ ,  $12$ , and  $21$  for the At, Os, and Zm data, respectively. Treatments sharing a common letter indicate groups that are not significantly different by non-parametric analysis (Kruskal–Wallis ANOVA with Dunn multiple comparison test,  $\alpha = 0.05$ ). At: *Arabidopsis thaliana*, Os: *Oryza sativa*, Zm: *Zea mays*.

B) MMAP reads only. Same analysis and plotting conventions as in panel A.

C) False negative rates for alignments of real sRNA-seq data with the indicated methods for MMAP reads. Plotting conventions as in panel A.

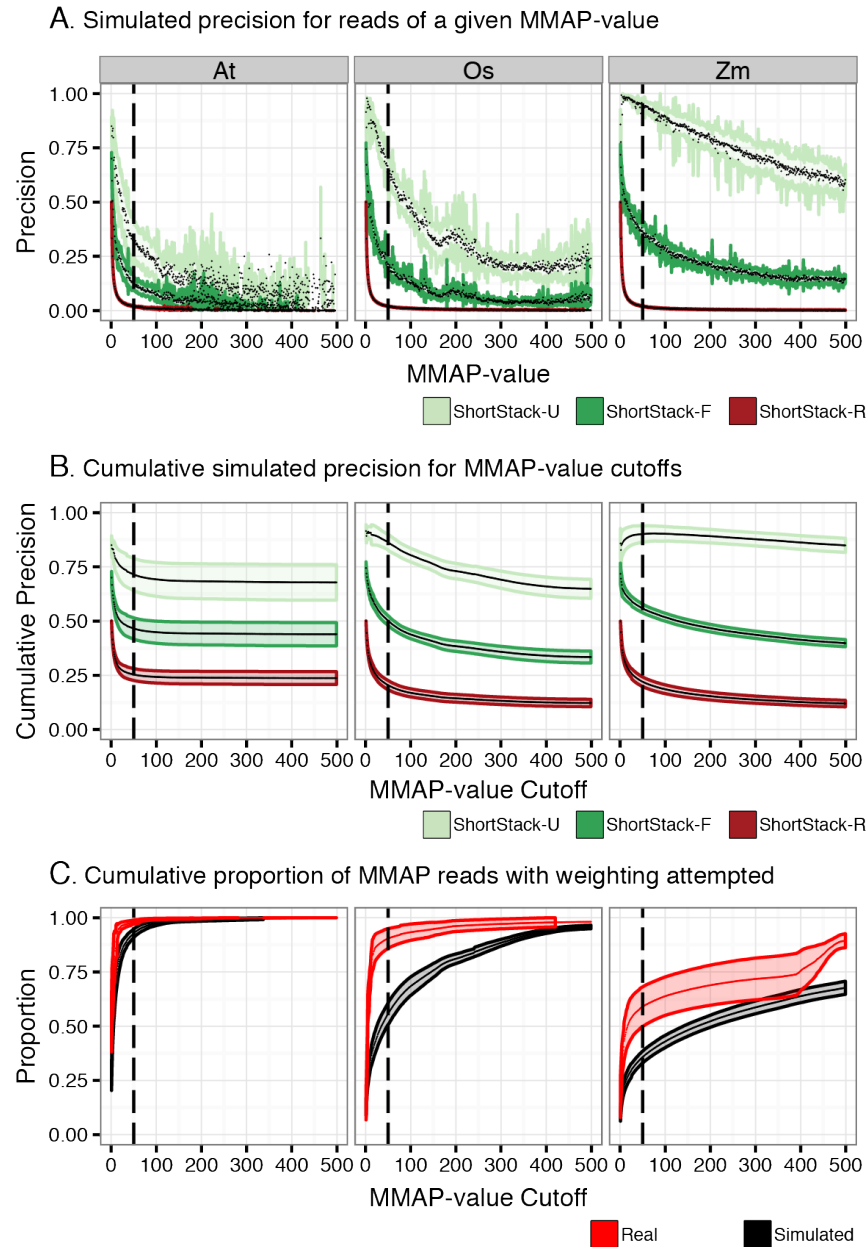

**Figure 5.** Influence of MMAP-value on performance

A) Precision as a function of MMAP-value for simulated sRNA-seq data from the indicated species and alignment method. MMAP-value is the number of possible alignment positions for a read. Colored lines are standard deviations, black dots are mean values. Heavy dashed line at MMAP=50 indicates the default cutoff value for ShortStack, above which placement of MMAP reads is not attempted. At: *Arabidopsis thaliana*, Os: *Oryza sativa*, Zm: *Zea mays*.

B) Cumulative precision as a function of MMAP-value for simulated sRNA-seq data from the indicated species and alignment method. Plotting conventions as in panel A.

C) Cumulative proportion of real and simulated sRNA-seq data retained by ShortStack alignments under differing MMAP-value cutoffs. Note that simulated libraries have higher proportions of reads with high MMAP values. Plotting conventions as in panel A.

# A. qRT-PCR - primary-miRNA

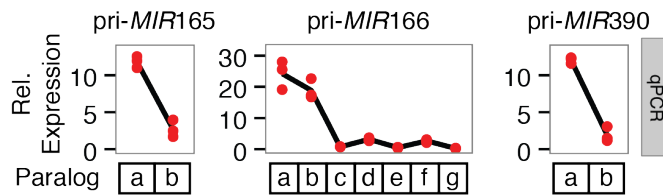

# B. sRNA-seq - mature miRNA

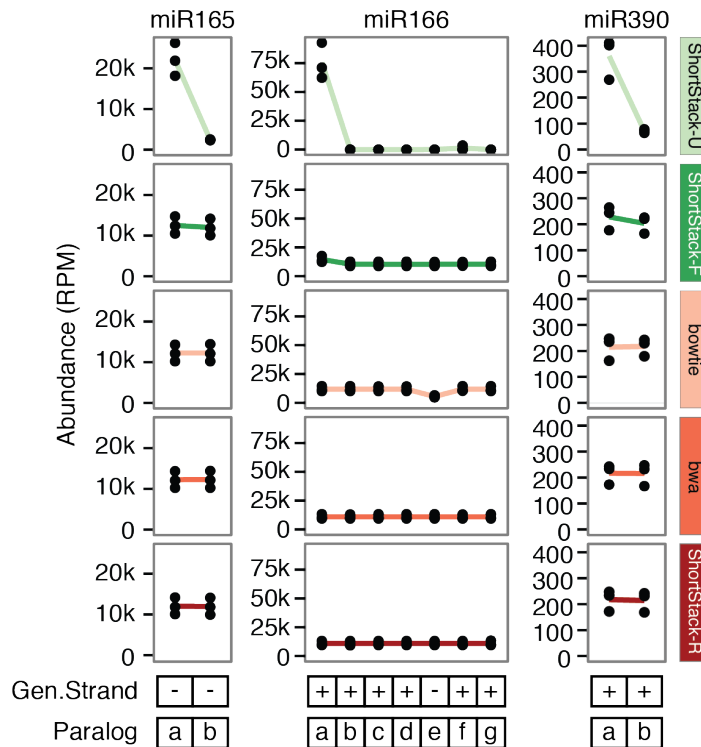

# C.

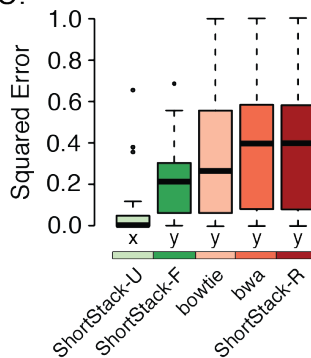

## Figure 6. Experimental assessment of sRNA-seq alignment methods using miRNA paralogs

A) Relative expression of the indicated primary *MIRNA* transcripts in *Arabidopsis thaliana* Col-0 inflorescences assessed via qRT-PCR. Values are normalized to 1/1000 those of *ACTIN2*. Dots show values from biological replicates (n=3).

B) Accumulation of the indicated mature miRNAs from each of their possible paralogs as determined by different sRNA-seq alignment methods. Values are from three biological replicate sRNA-seq libraries from *Arabidopsis thaliana* Col-0 inflorescences.

C) Squared residual errors from comparisons of scaled qRT-PCR data to scaled sRNA-seq alignment results. Boxplots show medians (horizontal bars), the 1st to 3rd quartile range (boxes), data out to 1.5 times the inter-quartile range (whiskers), and outliers (dots). Treatments sharing a common letter indicate groups that are not significantly different by non-parametric analysis (Kruskal–Wallis ANOVA with Dunn multiple comparison test,  $\alpha = 0.05$ ).



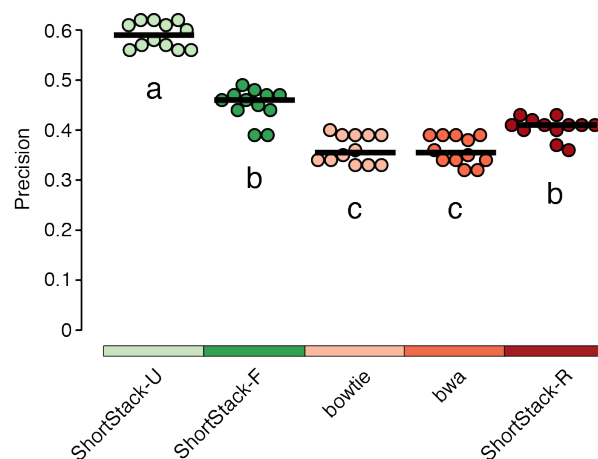

**Figure 7.** Precisions from alignments of *Arabidopsis thaliana* MMAP 24 nt siRNAs whose true origins are known based on a unique precursor alignment. Dots: data from individual libraries; horizontal bars: medians. Treatments sharing a common letter indicate groups that are not significantly different by non-parametric analysis (Kruskal–Wallis ANOVA with Dunn multiple comparison test,  $\alpha = 0.05$ ).

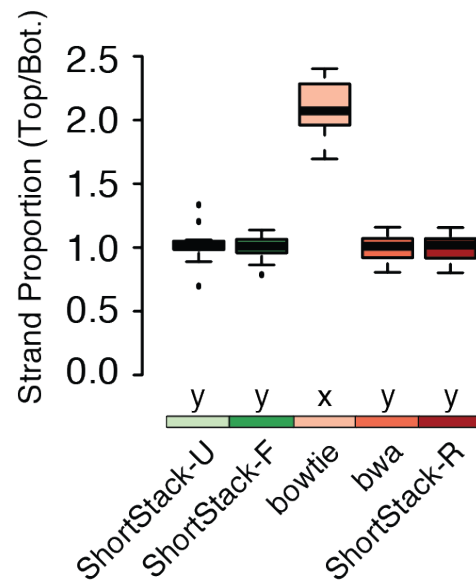

**Figure 8.** Strand-biased selection of MMAP alignment positions by bowtie. Bias is shown as the overall ratio of top-strand aligned reads to bottom, based on simulated libraries from *Arabidopsis thaliana* (n=15). Boxplots show medians (horizontal bars), the 1st to 3rd quartile range (boxes), data out to 1.5 times the inter-quartile range (whiskers), and outliers (dots). Treatments sharing a common letter indicate groups that are not significantly different by non-parametric analysis (Kruskal–Wallis ANOVA with Dunn multiple comparison test,  $\alpha = 0.05$ ).

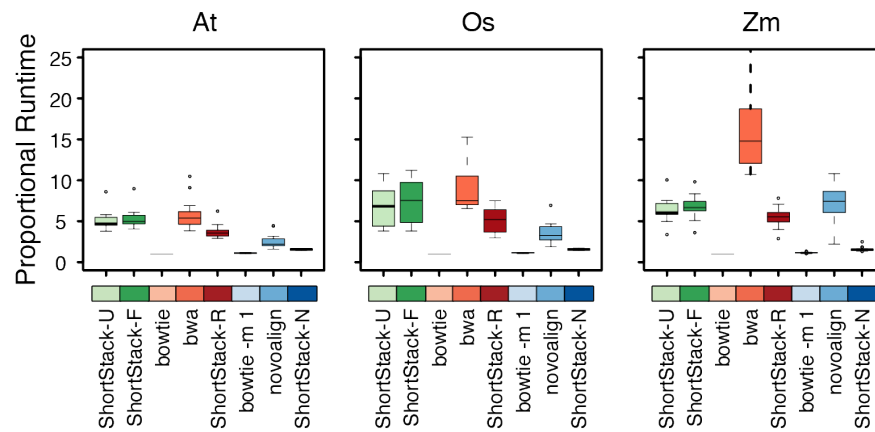

**Figure 9.** Comparison of alignment times for real sRNA-seq libraries with the indicated methods. Boxplots show medians (central bars), the 1st to 3rd quartile range (boxes), other data out to 1.5 the interquartile range (whiskers), and outliers (dots). n=15, 12, and 21 for the At, Os, and Zm data, respectively. At: *Arabidopsis thaliana*, Os: *Oryza sativa*, Zm: *Zea mays*.
